# Supplementary material for: Novel bismuth oxosalts, β-Bi3O3(VO4) and KBi5O5(PO4)2: synthesis and effect of hydrothermal pressure on the crystal structure
Source: Royal Society of Chemistry journal article supplement (doi:10.1039/d3nj02060f), 2023-01-01
Supplement: d3nj02060f1.pdf [file d3nj02060f1.pdf]

## SUPPORTING INFORMATIONS

### **Novel bismuth oxosalts, $\beta$ -Bi<sub>3</sub>O<sub>3</sub>(VO<sub>4</sub>) and KBi<sub>5</sub>O<sub>5</sub>(PO<sub>4</sub>)<sub>2</sub>: synthesis and effect of hydrothermal pressure on the crystal structure**

Larisa Shvanskaya,<sup>\*a</sup> Polina Krikunova,<sup>b</sup> Irina Nikolaeva,<sup>a</sup> Konstantin Lyssenko,<sup>c</sup> Nikolay Pokryshkin,<sup>d,e</sup> Victor Timoshenko<sup>c</sup>

<sup>a</sup>Lomonosov Moscow State University, Faculty of Geology, Moscow 119991, Russia.

<sup>b</sup>FSRC “Crystallography and Photonics” RAS, Moscow 119333, Russia.

<sup>c</sup>Lomonosov Moscow State University, Faculty of Chemistry, Moscow 119991, Russia.

<sup>d</sup>National Research Nuclear University “MEPhI”, Phys-Bio Institute, Moscow 115409, Russia.

<sup>e</sup>Lomonosov Moscow State University, Faculty of Physics, Moscow 119991, Russia.

[\\*Ishvanskaya@mail.ru](mailto:Ishvanskaya@mail.ru)

#### Table of contents

|                           |    |
|---------------------------|----|
| 1. Images of crystals     | S2 |
| 2. Chemical composition   | S2 |
| 3. Thermal behavior       | S4 |
| 4. X-ray diffraction data | S4 |

## 1. Images of crystals

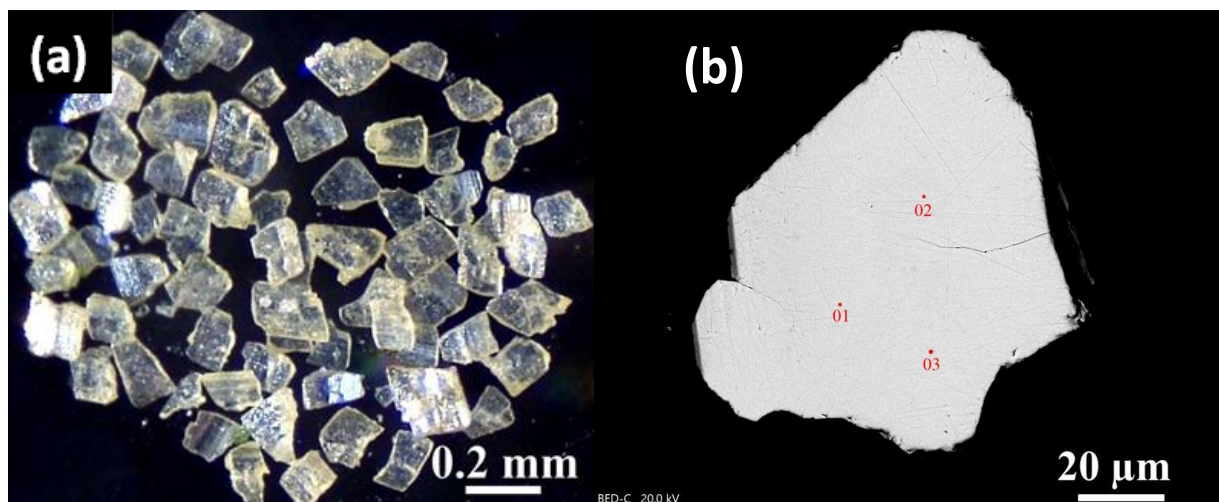

**Figure S1.** Plate-like crystals of  $\beta\text{-Bi}_3\text{O}_3\text{VO}_4$ : (a) photo of bulk sample under optical microscope, (b) grain, SEM image.

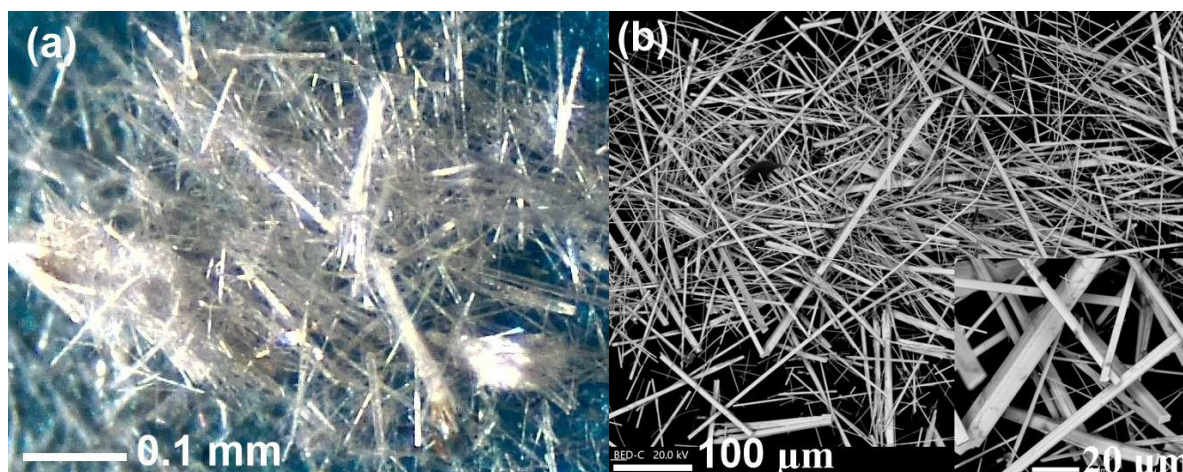

**Figure S2.** Needle-like crystals of  $\text{KBi}_5\text{O}_5(\text{PO}_4)_2$ : (a) photo under optical microscope, (b) SEM image.

## 2. Chemical composition

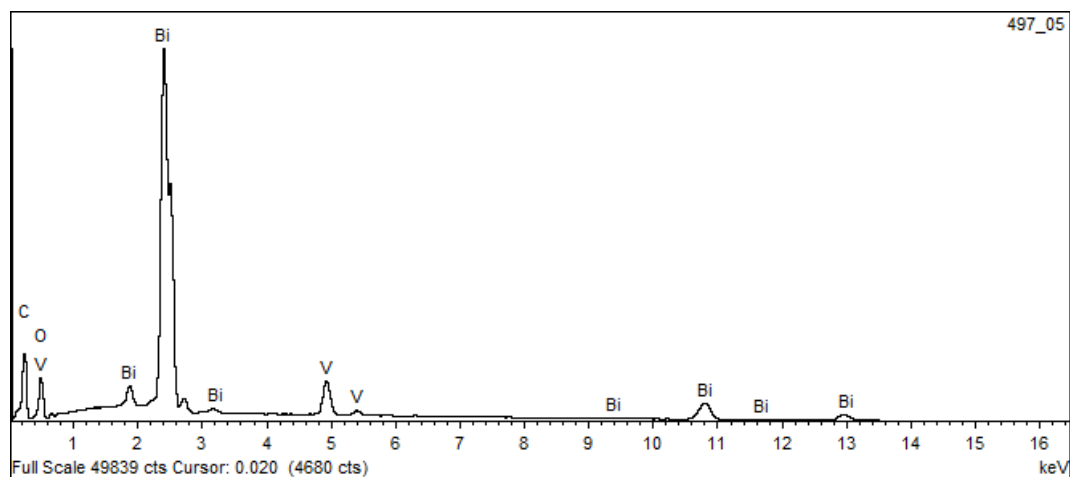

**Figure S3.** EDS spectrum of  $\text{Bi}_3(\text{VO}_4)\text{O}_3$  compound.

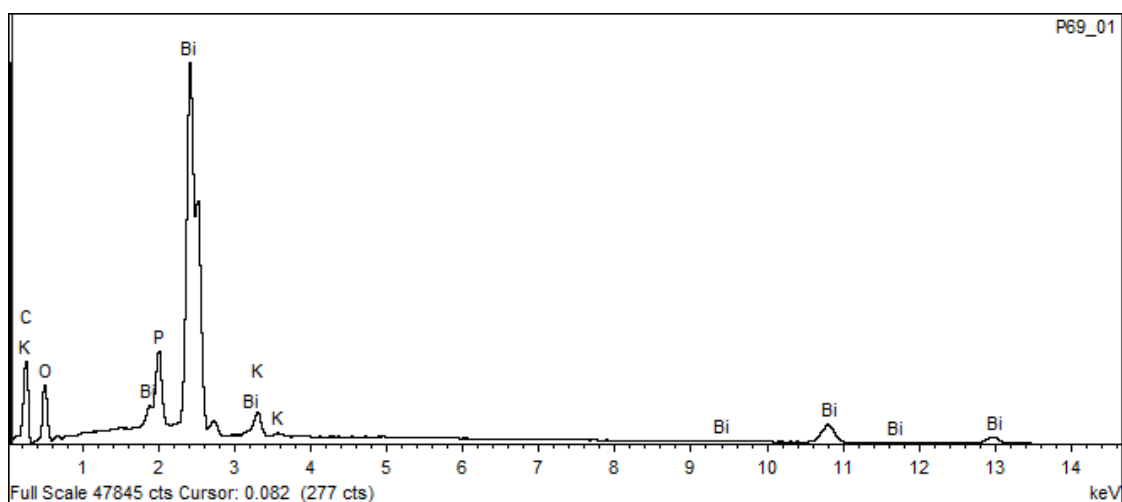

**Figure S4.** EDS spectrum of  $\text{KBi}_5\text{O}_5(\text{PO}_4)_2$  compound.

**Table S1.** Chemical composition of sample (I)\* determined by EDS analysis

| Element       | Atomic % |      |       | Weight %                |                        |        |
|---------------|----------|------|-------|-------------------------|------------------------|--------|
|               | Bi       | V    | O     | $\text{Bi}_2\text{O}_3$ | $\text{V}_2\text{O}_5$ | Total  |
| Point 1       | 27.23    | 9.12 | 63.65 | 89.53                   | 11.71                  | 101.24 |
| Point 2       | 27.34    | 9.04 | 63.62 | 88.51                   | 11.42                  | 99.93  |
| Point 3       | 27.23    | 9.12 | 63.65 | 88.58                   | 11.58                  | 100.16 |
| Average value | 27.26    | 9.09 | 63.64 |                         |                        |        |

\*Chemical formula. calculated from EDS results:  $\text{Bi}_{2.99}\text{V}_{1.00}\text{O}_{7.00}$

**Table S2.** Chemical composition of sample (II)\* determined by EDS analysis

| Element       | Atomic % |       |      |       | Weight %             |                         |                        |       |
|---------------|----------|-------|------|-------|----------------------|-------------------------|------------------------|-------|
|               | K        | Bi    | P    | O     | $\text{K}_2\text{O}$ | $\text{Bi}_2\text{O}_3$ | $\text{P}_2\text{O}_5$ | Total |
| Point 1       | 4.77     | 24.54 | 9.00 | 61.69 | 3.41                 | 86.74                   | 9.69                   | 99.85 |
| Point 2       | 4.82     | 24.56 | 8.96 | 61.66 | 3.42                 | 86.17                   | 9.58                   | 99.17 |
| Point 3       | 4.95     | 24.74 | 8.78 | 61.53 | 3.48                 | 86.03                   | 9.3                    | 98.82 |
| Average value | 4.86     | 24.61 | 8.91 | 61.63 |                      |                         |                        |       |

\*Chemical formula. calculated from EDS results:  $\text{K}_{0.99}\text{Bi}_{4.99}\text{P}_{1.81}\text{O}_{12.52}$

The lower oxygen amount from the EDS analysis may be related to the small thickness of needle crystals, which is smaller than the size of the effective emission region of characteristic radiation for O. at 20 kV > 10-15  $\mu\text{m}$ .

### 3. Thermal behavior

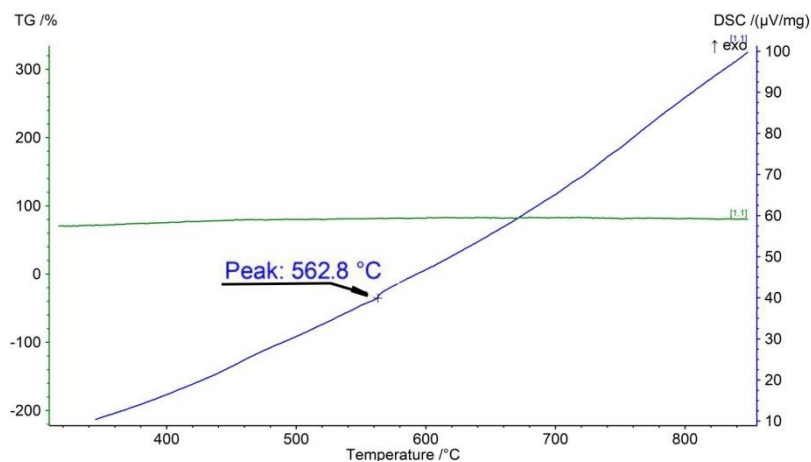

**Figure S9.** Thermogravimetric curves of  $\beta\text{-Bi}_3\text{O}_3(\text{VO}_4)$ .

### 4. X-ray diffraction data

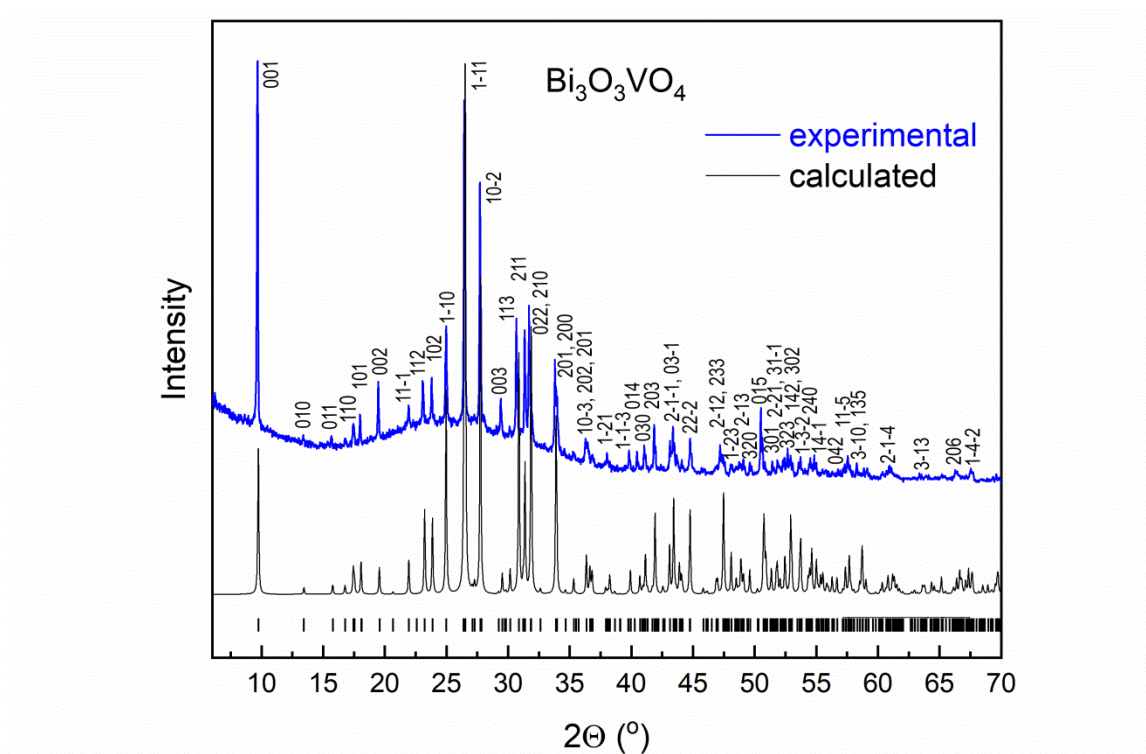

**Figure S5.** Experimental and calculated powder XRD patterns of  $\beta\text{-Bi}_3\text{O}_3\text{VO}_4$  (the vertical ticks indicate the Bragg positions).



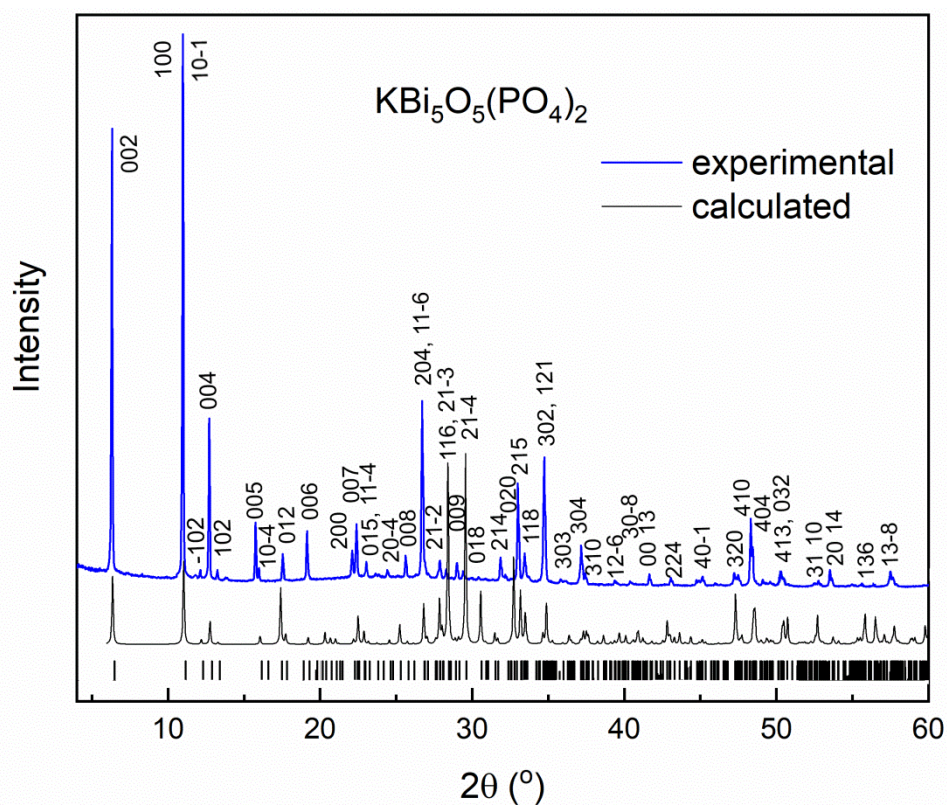

**Figure S6.** Experimental and calculated powder XRD patterns of  $\text{KBi}_5\text{O}_5(\text{PO}_4)_2$  (the vertical ticks indicate the Bragg positions). The differences observed in the intensities of some Bragg peaks can be explained by the preferred orientation of the needle-like crystals.

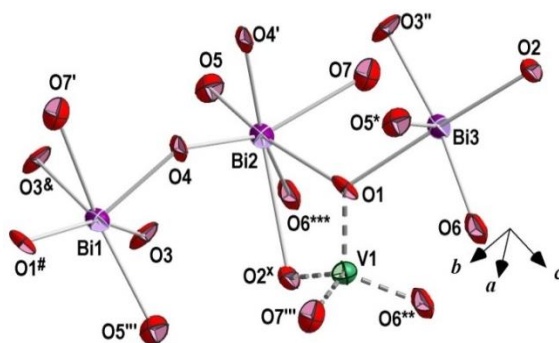

**Figure S7.** The basic structural units forming the crystal structure of  $\beta\text{-Bi}_3\text{O}_3(\text{VO}_4)$  with atom-labelling scheme. Displacement ellipsoids are presented at the 80% probability level. [Symmetry codes: (')  $-x, 1-y, 1-z$ ; (")  $x, -1+y, z$ ; (""')  $1+x, y, z$ ; (\*)  $1+x, -1+y, z$ ; (\*\*')  $1-x, -y, 2-z$ ; (\*\*\*)  $-1+x, 1+y, z$ ; (&')  $-x, 2-y, 1-z$ ; (#')  $1-x, 1-y, 1-z$ ; (x')  $x, 1+y, z$ ].

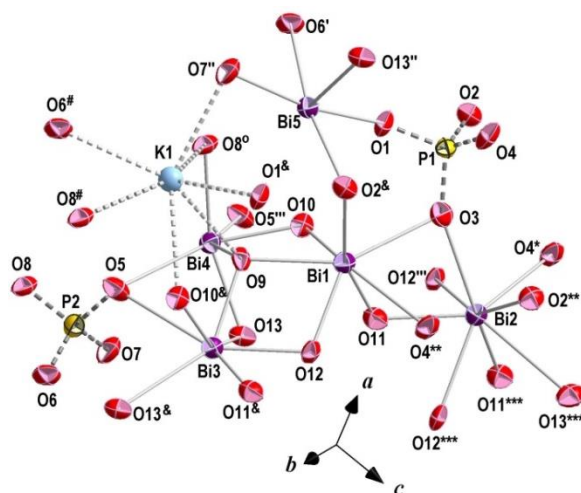

**Figure S8.** The basic structural units forming the crystal structure of  $\text{KBi}_5\text{O}_5(\text{PO}_4)_2$  with atom-labelling scheme. Displacement ellipsoids are presented at the 80% probability level. [Symmetry codes: (')  $1+x, -1+y, z$ ; (")  $1+x, y, z$ ; (""')  $x, -1+y, z$ ; (\*)  $2-x, y, \frac{1}{2}-z$ ; (\*\*\*)  $2-x, \frac{1}{2}+y, \frac{1}{2}-z$ ; (\*\*\*)  $1-x, -\frac{1}{2}+y, \frac{1}{2}-z$ ; (&)  $x, 1+y, z$ ; (#)  $1-x, 2-y, -z$ ; (°)  $1-x, 1-y, -z$ ].

**Table S3.** Bond valence data for  $\beta\text{-Bi}_3\text{O}_3(\text{VO}_4)$  (I)

|                            | Bi1            | Bi2   | Bi3            | V1    | $\Sigma$ |
|----------------------------|----------------|-------|----------------|-------|----------|
| <b>O1</b>                  | 0.168          | 0.236 | 0.475          | 1.205 | 2.08     |
| <b>O2</b>                  |                | 0.163 | 0.556          | 1.325 | 2.04     |
| <b>O3</b>                  | 0.684          | 0.097 | 0.646          |       | 2.03     |
| <b>O4</b>                  | 0.603<br>0.724 | 0.666 |                |       | 1.91     |
| <b>O5</b>                  | 0.391<br>0.109 | 0.646 | 0.771          |       | 1.92     |
| <b>O6</b>                  |                | 0.175 | 0.407<br>0.060 | 1.328 | 1.97     |
| <b>O7</b>                  | 0.236          | 0.420 |                | 1.238 | 1.89     |
| <b><math>\Sigma</math></b> | 2.92           | 2.92  | 2.92           | 5.10  |          |

**Table S4.** Bond valence data for  $\text{KBi}_5\text{O}_5(\text{PO}_4)_2$  (II)

|            | Bi1   | Bi2            | Bi3   | Bi4            | Bi5   | K              | P1    | P2    | $\Sigma$ |
|------------|-------|----------------|-------|----------------|-------|----------------|-------|-------|----------|
| <b>O1</b>  |       |                |       |                | 0.541 |                | 1.218 |       | 1.76     |
| <b>O2</b>  | 0.171 | 0.140          |       |                | 0.413 |                | 1.241 |       | 1.97     |
| <b>O3</b>  | 0.216 | 0.317          |       |                |       |                | 1.231 |       | 1.76     |
| <b>O4</b>  | 0.240 | 0.357          |       |                |       |                | 1.148 |       | 1.75     |
| <b>O5</b>  |       |                | 0.243 | 0.197<br>0.138 |       |                |       | 1.211 | 1.79     |
| <b>O6</b>  |       |                |       |                | 0.551 | 0.152          |       | 1.251 | 1.95     |
| <b>O7</b>  |       |                |       |                | 0.492 | 0.162          |       | 1.357 | 2.01     |
| <b>O8</b>  |       |                |       | 0.462          |       | 0.152<br>0.146 |       | 1.265 | 2.03     |
| <b>O9</b>  | 0.467 |                | 0.666 | 0.753          |       | 0.164          |       |       | 2.05     |
| <b>O10</b> | 0.552 |                | 0.659 | 0.733          |       | 0.155          |       |       | 2.10     |
| <b>O11</b> | 0.640 | 0.520<br>0.510 | 0.477 |                |       |                |       |       | 2.15     |

|            |       |       |       |       |       |      |      |      |      |
|------------|-------|-------|-------|-------|-------|------|------|------|------|
| <b>O12</b> | 0.593 | 0.669 | 0.592 |       |       |      |      |      | 2.18 |
| <b>O13</b> |       | 0.324 |       |       |       |      |      |      |      |
|            |       | 0.138 | 0.145 | 0.563 | 0.903 |      |      |      | 1.88 |
|            |       |       | 0.126 |       |       |      |      |      |      |
| <b>Σ</b>   | 2.88  | 2.98  | 2.91  | 2.85  | 2.90  | 0.93 | 4.84 | 5.08 |      |

**Table S5.** Selected geometric parameters (Å) for  $\beta$ -Bi<sub>3</sub>O<sub>3</sub>(VO<sub>4</sub>)

|                        |            |                       |            |
|------------------------|------------|-----------------------|------------|
| Bi1—O4                 | 2.145 (9)  | Bi2—O2 <sup>vii</sup> | 2.861 (9)  |
| Bi1—O3                 | 2.172 (8)  | Bi2—O3                | 3.110 (9)  |
| Bi1—O3 <sup>i</sup>    | 2.233 (9)  | Bi3—O5 <sup>iv</sup>  | 2.115 (8)  |
| Bi1—O5 <sup>ii</sup>   | 2.441 (9)  | Bi3—O3 <sup>v</sup>   | 2.200 (9)  |
| Bi1—O7 <sup>iii</sup>  | 2.683 (9)  | Bi3—O2                | 2.272 (9)  |
| Bi1—O1 <sup>viii</sup> | 2.845 (9)  | Bi3—O1                | 2.347 (9)  |
| Bi1—O5 <sup>i</sup>    | 3.055 (9)  | Bi3—O6                | 2.421 (9)  |
| Bi2—O4 <sup>iii</sup>  | 2.185 (8)  | Bi3—O6                | 3.344 (9)  |
| Bi2—O5                 | 2.200 (9)  | V1—O6 <sup>vi</sup>   | 1.698 (10) |
| Bi2—O4                 | 2.306 (8)  | V1—O2 <sup>vii</sup>  | 1.699 (9)  |
| Bi2—O7                 | 2.406 (10) | V1—O7 <sup>ii</sup>   | 1.724 (10) |
| Bi2—O1                 | 2.684 (9)  | V1—O1                 | 1.734 (9)  |
| Bi2—O6 <sup>ix</sup>   | 2.827 (9)  |                       |            |

Symmetry code(s): (i)  $-x, -y+2, -z+1$ ; (ii)  $x+1, y, z$ ; (iii)  $-x, -y+1, -z+1$ ; (iv)  $x+1, y-1, z$ ; (v)  $x, y-1, z$ ; (vi)  $-x+1, -y, -z+2$ ; (vii)  $x, y+1, z$ ; (viii)  $1-x, 1-y, 1-z$ ; (ix)  $-1+x, 1+y, z$

**Table S6.** Selected geometric parameters (Å) for KBi<sub>5</sub>O<sub>5</sub>(PO<sub>4</sub>)<sub>2</sub>

|                        |           |                         |           |
|------------------------|-----------|-------------------------|-----------|
| Bi1—O11                | 2.204 (8) | Bi4—O5 <sup>ii</sup>    | 2.769 (8) |
| Bi1—O12                | 2.241 (8) | Bi5—O13 <sup>viii</sup> | 2.039 (8) |
| Bi1—O10                | 2.275 (8) | Bi5—O6 <sup>ix</sup>    | 2.276 (8) |
| Bi1—O9                 | 2.355 (8) | Bi5—O1                  | 2.285 (8) |
| Bi1—O4 <sup>i</sup>    | 2.675 (8) | Bi5—O7 <sup>viii</sup>  | 2.330 (8) |
| Bi1—O3                 | 2.725 (8) | Bi5—O2 <sup>v</sup>     | 2.415 (8) |
| Bi2—O12 <sup>ii</sup>  | 2.183 (8) | K1—O9                   | 2.802 (8) |
| Bi2—O11 <sup>iii</sup> | 2.304 (8) | K1—O7 <sup>viii</sup>   | 2.805 (9) |
| Bi2—O11                | 2.313 (9) | K1—O10 <sup>v</sup>     | 2.821 (8) |
| Bi2—O4 <sup>iv</sup>   | 2.484 (8) | K1—O6 <sup>x</sup>      | 2.829 (9) |
| Bi2—O12 <sup>iii</sup> | 2.531 (8) | K1—O8 <sup>x</sup>      | 2.830 (8) |
| Bi2—O3                 | 2.542 (8) | K1—O8 <sup>vi</sup>     | 2.843 (8) |
| Bi3—O9                 | 2.185 (8) | P1—O2                   | 1.537 (8) |
| Bi3—O10 <sup>v</sup>   | 2.190 (8) | P1—O3                   | 1.540 (8) |

|                      |           |       |           |
|----------------------|-----------|-------|-----------|
| Bi3—O12              | 2.242 (8) | P1—O1 | 1.544 (8) |
| Bi3—O11 <sup>v</sup> | 2.345 (9) | P1—O4 | 1.566 (9) |
| Bi3—O5               | 2.668 (8) | P2—O7 | 1.504 (9) |
| Bi4—O9               | 2.126 (8) | P2—O8 | 1.530 (8) |
| Bi4—O10              | 2.139 (8) | P2—O6 | 1.534 (8) |
| Bi4—O13              | 2.263 (8) | P2—O5 | 1.546 (8) |
| Bi4—O8 <sup>vi</sup> | 2.360 (7) |       |           |

Symmetry code(s): (i)  $-x+2, y+1/2, -z+1/2$ ; (ii)  $x, y-1, z$ ; (iii)  $-x+1, y-1/2, -z+1/2$ ; (iv)  $-x+2, y-1/2, -z+1/2$ ; (v)  $x, y+1, z$ ; (vi)  $-x+1, -y+1, -z$ ; (vii)  $x-1, y, z$ ; (viii)  $x+1, y, z$ ; (ix)  $x+1, y-1, z$ ; (x)  $-x+1, -y+2, -z$ .

**Table S7.** Crystallographic parameters of structurally related oxosalts

|                             | KBi <sub>5</sub> O <sub>5</sub> (PO <sub>4</sub> ) <sub>2</sub> (our work) | $\alpha$ -Bi <sub>3</sub> O <sub>3</sub> (VO <sub>4</sub> ) (Colmont et al., 2020) |
|-----------------------------|----------------------------------------------------------------------------|------------------------------------------------------------------------------------|
| Sp.group                    | <i>P2<sub>1</sub>/c</i>                                                    | <i>P<math>\bar{1}</math></i>                                                       |
| <i>a. b. c</i> (Å)          | 8.026(6). 5.462(4). 27.769(2)                                              | 5.682(1). 8.479(2). 14.243(3)                                                      |
| $\alpha. \beta. \gamma$ (°) | 90.0. 95.7(2). 90.0                                                        | 81.39(1). 86.91(1). 88.53(1)                                                       |
| <i>V</i> (Å <sup>3</sup> )  | 1211.29(16)                                                                | 677.389                                                                            |
